# Supplementary material
Source: publisher site journal article supplement (https://www.dovepress.com/article/220533)
Supplement: Supplementary file 1 [file get_supplementary_file.php]

**Supplementary materials**

**Related Computerized Programs for Nomogram With R**

library(foreign)

bc<-read.spss("C:/Users/TangXY/Desktop/OA_1.sav",use.value.labels=F, to.data.frame=T)

dim(bc)

bc <- na.omit(bc)

library(rms)

dd <- datadist(bc)

options(datadist="dd")

bc$stage<-factor(bc$stage,labels=c("I-II","III-IV"))

bc$residule<-factor(bc$residule,labels=c("<=1cm",">1cm"))

bc$aHIF<-factor(bc$aHIF,labels=c("low","high"))

f <- cph(Surv(time, status) ~ stage + residule + aHIF, x=T, y=T, surv=T, data=bc)

surv <- Survival(f)

surv1<-function(x) surv(365*1,x)

surv2<-function(x) surv(365*3,x)

nom <- nomogram(f, fun=list(surv1,surv2), lp=F, funlabel=c("1-year survival", "3-year survival"), maxscale=10, fun.at= c(0.95,0.9,0.85,0.8,0.75,0.7,0.6,0.5,0.4,0.3,0.2,0.1,0)) plot(nom)

print(nom)

Points per unit of linear predictor: NaN

Linear predictor units per point : NaN

stage Points

I-II 0

III-IV 10

residule Points

<=1cm 0

>1cm 5

aHIF Points

low 0

high 6

Total Points 1-year survival

11 0.95

16 0.90

19 0.85

21 0.80

Total Points 3-year survival

2 0.90

5 0.85

7 0.80

9 0.75

11 0.70

13 0.60

15 0.50

17 0.40

19 0.30

21 0.20

validate(f, method="boot", B=1000, dxy=T)

index.orig training test optimism index.corrected n

Dxy 0.5120 0.5170 0.4960 0.0210 0.4910 1000

R2 0.3871 0.4095 0.3648 0.0447 0.3424 1000

Slope 1.0000 1.0000 0.8968 0.1032 0.8968 1000

D 0.1053 0.1170 0.0975 0.0194 0.0859 1000

U -0.0073 -0.0074 0.0079 -0.0152 0.0079 1000

Q 0.1126 0.1243 0.0897 0.0347 0.0779 1000

g 1.2664 1.3655 1.1804 0.1851 1.0814 1000

rcorrcens(Surv(time, status) ~ predict(f), data = bc)

Somers' Rank Correlation for Censored Data Response variable:Surv(time, status)

C Dxy aDxy SD Z P n

predict(f) 0.244 -0.512 0.512 0.067 7.67 0 62

f1 <- cph(Surv(time, status) ~ stage + residule + aHIF, x=T, y=T, surv=T, data=bc, time.inc=365*1)

cal1 <- calibrate(f1, cmethod="KM", method="boot", u=365*1, m=20, B=1000)

plot(cal1)

f3 <- cph(Surv(time, status) ~ stage + residule + aHIF, x=T, y=T, surv=T, data=bc, time.inc=365*3)

cal3 <- calibrate(f3, cmethod="KM", method="boot", u=365*3, m=20, B=1000)

plot(cal3)

plot(cal1, lwd=2, lty=1, errbar.col=c(rgb(0,118,192,maxColorValue=255)), xlim=c(0.7,1),ylim=c(0.7,1)

xlab="Nomogram-Predicted Probability of 1-Year OS",ylab="Actual 1-Year OS(proportion)",col=c(rgb(192,98,83,maxColorValue=255)))

lines(cal1[,c("mean.predicted","KM")], type="b", lwd=2, col=c(rgb(192,98,83,maxColorValue=255)), pch=16)

abline(0, 1, lty=3, lwd=1, col=c(rgb(0,118,192,maxColorValue=255)))

plot(cal3, lwd=2, lty=1, errbar.col=c(rgb(0,118,192,maxColorValue=255)), xlim=c(0.2,1),ylim=c(0.2,1)

xlab="Nomogram-Predicted Probability of 3-Year OS",ylab="Actual 3-Year OS(proportion)",col=c(rgb(192,98,83,maxColorValue=255)))

lines(cal3[,c("mean.predicted","KM")], type="b", lwd=2, col=c(rgb(192,98,83,maxColorValue=255)), pch=16)

abline(0, 1, lty=3, lwd=1, col=c(rgb(0,118,192,maxColorValue=255)))
